# Supplementary material for: Obesity diminishes response to PD-1-based immunotherapies in renal cancer
Source: PubMed Central journal article supplement — J Immunother Cancer. 2020 Dec 22;8(2):e000725. doi: 10.1136/jitc-2020-000725 (PMC7757487; doi:10.1136/jitc-2020-000725), 2020-12-22
Supplement: jitc-2020-000725supp001.pdf [file jitc-2020-000725supp001.pdf]

## Supplemental Materials and Methods

### T Cell Repertoire Sequencing and Analysis

For TCR library preparation, we used the commercially available iRepertoire platform (iRepertoire; Huntsville, AL) for nested amplicon arm-PCR (1) of CDR3 regions of the mouse TCR  $\beta$ -chains, with addition of adapters for Illumina platform sequencing. Reverse transcription of 1.5ug of RNA was conducted with the One-Step reverse transcription and amplification kit (Qiagen). The PCR product was purified using Ampure XP magnetic beads (Beckman Coulter), and secondary amplification of the resulting product was performed using GoTaq G2 PCR Kit (Promega), allowing addition of Illumina adapter sequences. Libraries were purified with Ampure XP magnetic beads and sequenced using Illumina MiSeq 250nt paired-end read-length. TCR CDR3 sequences were extracted from the raw sequencing data via the iRmap pipeline (2).

TCR high-throughput sequencing (HTS) data were analyzed in R environment using the tcR package v.2.2.2 (3) and common R routines. TCR repertoire diversity was assessed using True Diversity indices and directly observed richness. Comparative analysis of TCR repertoire richness was performed after normalization of the HTS depth. Total datasets were downsampled to 250,000 randomly chosen sequencing reads using bootstrapping with 1000 iterations. For the comparative analysis of TCR repertoire diversity indices, a downsampling of repertoire sizes to the size of the smallest repertoire was performed using bootstrapping with 1000 iterations. A median of each simulated richness and diversity distribution was used as estimated richness or diversity, accordingly (4). The treatment groups were compared using Kruskal-Wallis ANOVA.

**Supplemental References:**

1. Han J, et al. Simultaneous amplification and identification of 25 human papillomavirus types with Tempex technology. *J Clin Microbiol.* 2006;44(11):4157-62.
2. Wang C, et al. High throughput sequencing reveals a complex pattern of dynamic interrelationships among human T cell subsets. *Proc Natl Acad Sci U S A.* 2010;107(4):1518-23.
3. Nazarov VI, et al. tcR: an R package for T cell receptor repertoire advanced data analysis. *BMC Bioinformatics.* 2015;16:175.
4. Venturi V, Kedzierska K, Turner SJ, Doherty PC, and Davenport MP. Methods for comparing the diversity of samples of the T cell receptor repertoire. *J Immunol Methods.* 2007;321(1-2):182-95.

## Supplemental Data

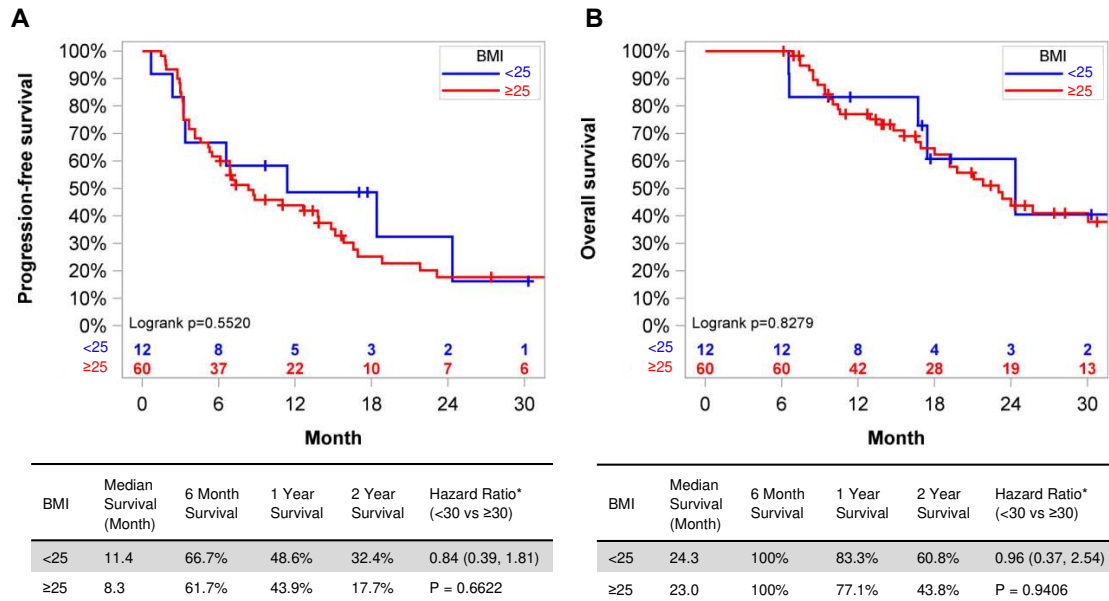

**Supplementary Figure 1. Analysis of metastatic RCC patients with combined overweight or obesity (BMI  $\geq 25$  kg/m<sup>2</sup>) reveals no alteration in PFS or OS, as compared to lean (BMI  $< 25$  kg/m<sup>2</sup>) metastatic RCC patients receiving anti-PD-1.** The same patient cohort shown in Figure 1, analyzed for (A) Progression-free (PFS) and (B) overall survival (OS) of metastatic RCC patients treated with anti-PD-1, categorized by indicated BMI status. Survival curves for PFS and OS across BMI categories were generated with the Kaplan-Meier method. Hazard ratios were calculated from a Cox model controlling for patients' age, sex, IMDC risk score, and number of prior therapies.

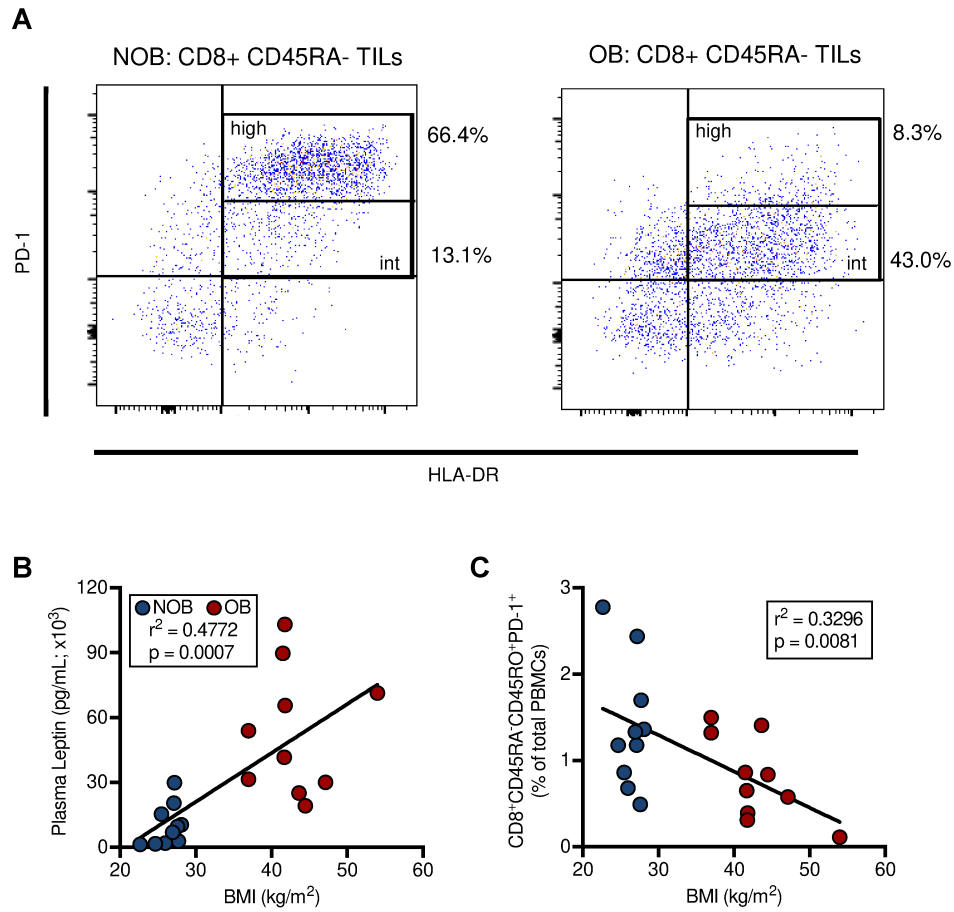

**Supplementary Figure 2. BMI differentially correlates with plasma leptin and activated PD-1<sup>+</sup> peripheral blood CD8 T cells.** (A) Representative flow cytometry plots showing PD-1 gating strategy for CD8<sup>+</sup>CD45RA<sup>-</sup> TILs. Linear regression analysis of BMI versus (B) plasma leptin or (C) peripheral blood activated PD-1<sup>+</sup> CD8<sup>+</sup> T cells.

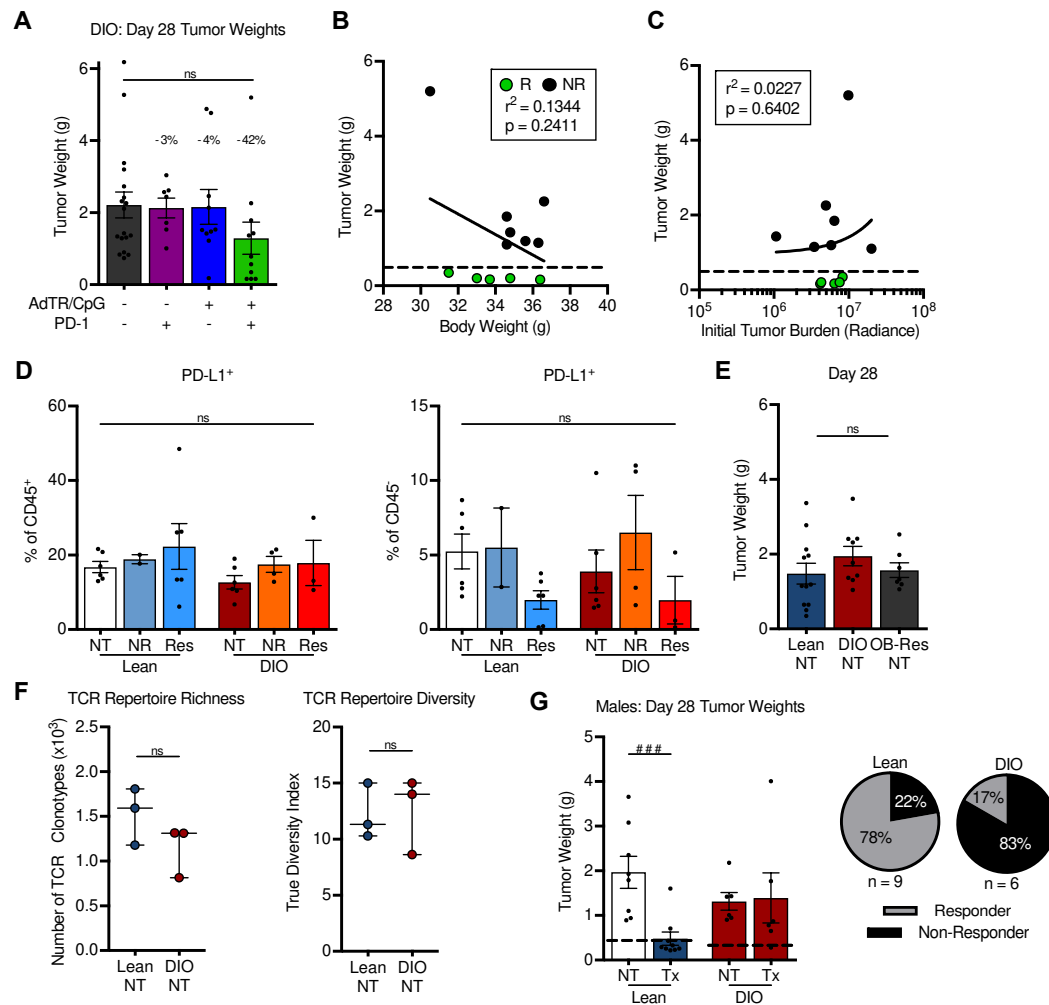

**Supplementary Figure 3. Tumor burden at treatment initiation, initial body weight, day 28 PD-L1 expression on intratumoral CD45<sup>+</sup> and CD45<sup>-</sup> cells, TCR repertoire and diversity, and sex of mice do not predict or influence treatment outcomes.** (A) Day 28 tumor weights for DIO animals treated with NT, single agent anti-PD-1, AdTR/CpG, or AdTR/CpG/PD-1. Regression analysis between day 28 tumor weights and (B) initial body weight at tumor challenge or (C) initial tumor burden at the time of treatment initiation on day 7. Responders (R) = green and non-responders (NR) = black. (D) Percentages of PD-L1<sup>+</sup> cells at day 28 among (left) CD45<sup>+</sup> and (right) CD45<sup>-</sup> cells. (E) Day 28 tumor weights of NT Lean, DIO, and OB-Res mice (repeated data from Fig. 3F). (F) Whole-tumor TCR $\beta$  CDR3 sequencing analysis from day 28 excised tumors. High throughput sequencing reads-normalized repertoire (left) richness and (right) diversity. (G) Day 28 renal tumor weights for lean and DIO male mice, treated as previously indicated, and resulting AdTR/CpG/PD-1 response rates. (B-E,G) Data are pooled from at least two independent experiments or (A,F) a single experiment and presented as means  $\pm$  SEM. Statistical differences were determined using non-parametric Mann-Whitney U tests (### $p < 0.001$ ), linear regression analyses, or two-way ANOVA. NT = no therapy; NR = non-responder; Res = responder; Tx = AdTR/CpG/PD-1.

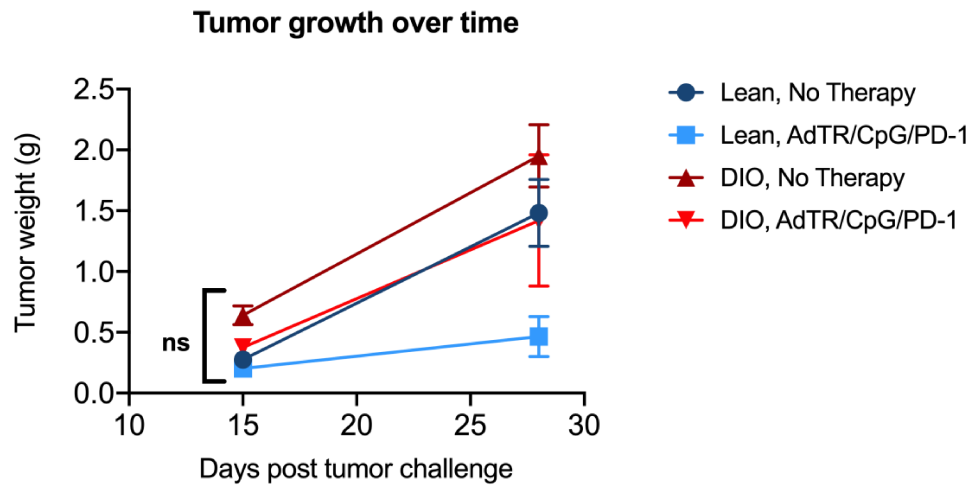

| Day 28 Comparisons                         | Significance | Adjusted p-value |
|--------------------------------------------|--------------|------------------|
| Lean, No Therapy vs. Lean, AdTR/CpG/PD-1   | **           | 0.0041           |
| Lean, No Therapy vs. DIO, No Therapy       | ns           | 0.9240           |
| Lean, No Therapy vs. DIO, AdTR/CpG/PD-1    | ns           | >0.9999          |
| Lean, AdTR/CpG/PD-1 vs. DIO, No Therapy    | ****         | <0.0001          |
| Lean, AdTR/CpG/PD-1 vs. DIO, AdTR/CpG/PD-1 | *            | 0.0191           |
| DIO, No Therapy vs. DIO, AdTR/CpG/PD-1     | ns           | 0.7813           |

**Supplemental Figure 4. Mixed-effects modeling of tumor growth over time confirms loss of therapeutic efficacy in DIO mice with orthotopic renal tumors as compared to lean counterparts.** Mixed-effects model with Bonferroni correction analysis was completed on cumulative data of day 15 and day 28 post tumor-challenge tumor weights in no therapy and AdTR/CpG/PD-1-treated lean and DIO mice. No significant differences were detected at day 15 post-tumor challenge. Differences detected at day 28 post-tumor challenge are detailed in the table above.

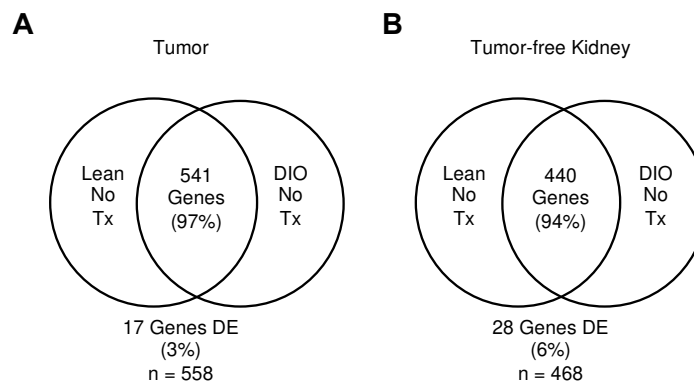

**Supplementary Figure 5. The immunogenetic landscape of intratumoral and tumor-free kidneys is minimally altered by obesity in the absence of immunotherapy.** Tumor samples and contralateral tumor-free kidneys from lean and DIO treatment-naïve mice were collected at day 28 post-tumor challenge and analyzed using nanoString's PanCancer Immune Profiling platform. **(A)** Analysis of differentially expressed (DE) genes within tumors indicates equivalent gene expression in 97% of genes examined. **(B)** Analysis of DE genes in tumor-free kidneys indicates equivalent gene expression in 94% of genes examined. Data are from one experiment. Tx = AdTR/CpG/PD-1.

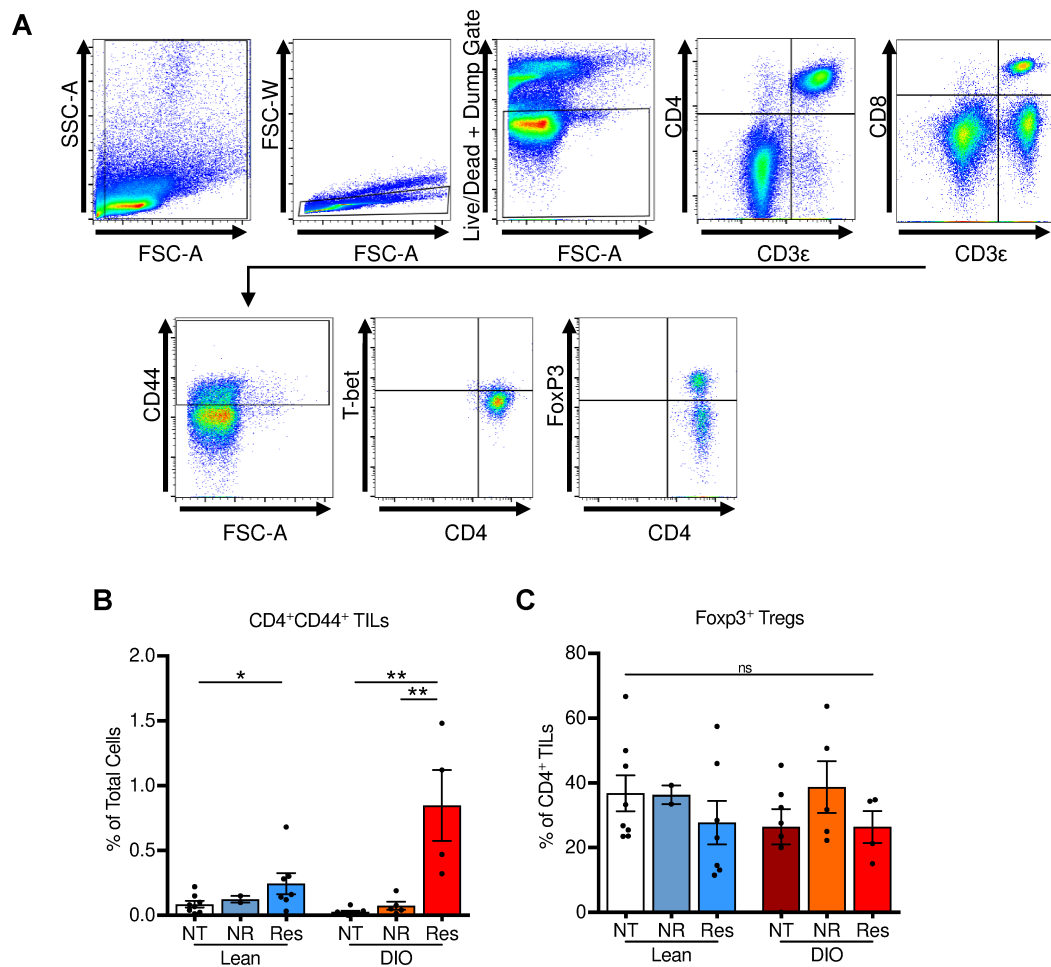

**Supplementary Figure 6. Intratumoral CD4<sup>+</sup> T cell populations from lean and DIO mice.** On day 28 post tumor challenge, intratumoral T cells were analyzed by flow cytometry. (A) Gating strategies used and resulting frequencies of (B) activated CD4<sup>+</sup> TILs and (C) CD4<sup>+</sup>Foxp3<sup>+</sup> Tregs. Data are presented as means  $\pm$  SEM from at least two independent experiments. Statistical differences were determined using two-way ANOVA followed by post hoc Bonferroni's multiple comparisons tests (\* $p$ <0.05, \*\* $p$ <0.01, \*\*\* $p$ <0.001). NT = no therapy; NR = non-responder; Res = responder.



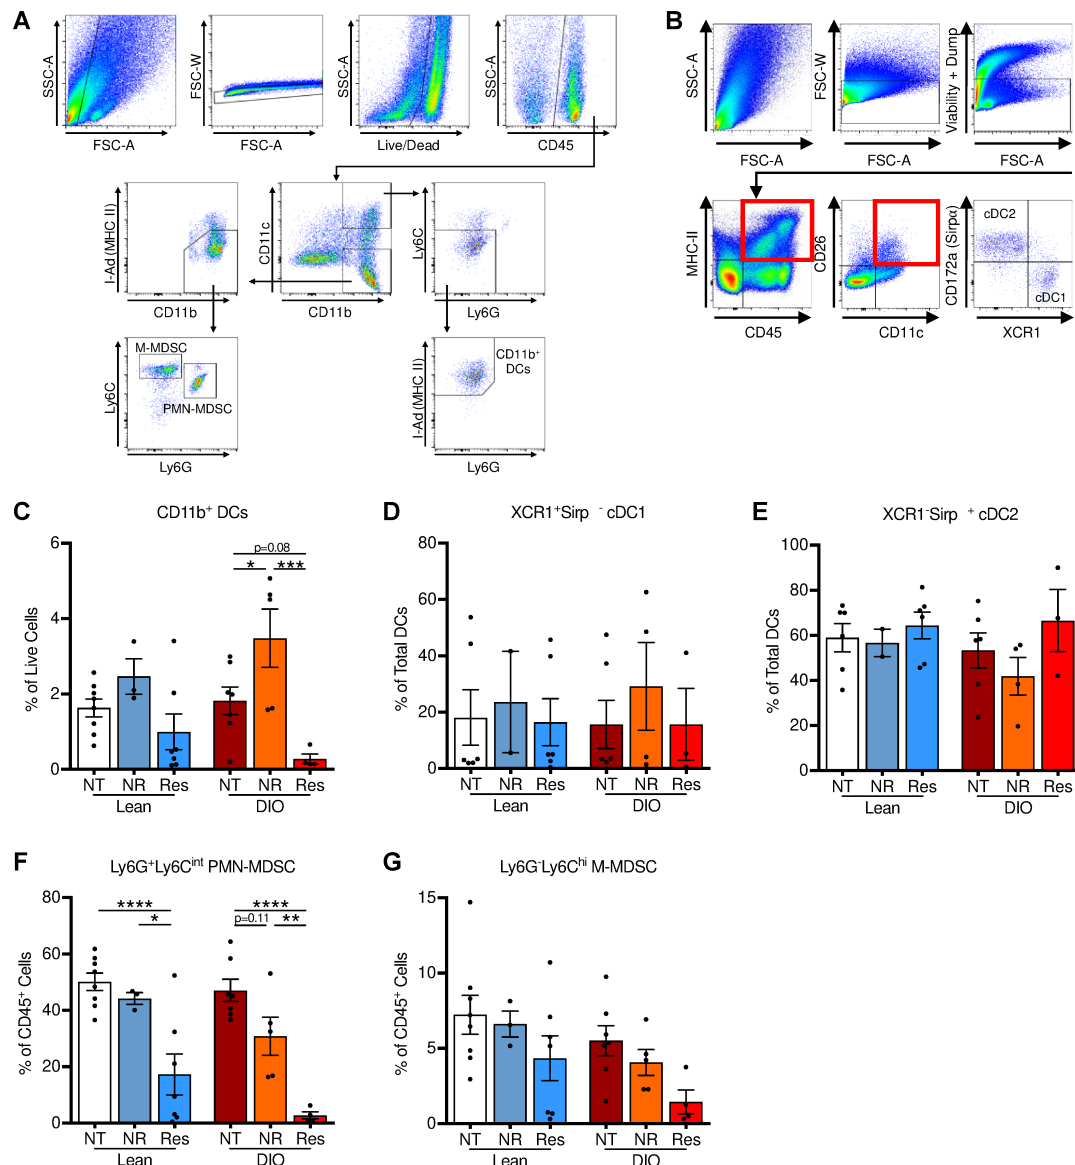

### Supplementary Figure 7. Intratumoral MDSC and DC populations in lean and DIO mice.

On day 28 post-tumor challenge, intratumoral MDSCs and DCs from lean and DIO mice receiving no therapy or AdTR/CpG/PD-1 were analyzed by flow cytometry. (A,B) Gating strategies and resulting frequencies of (C) CD11b<sup>+</sup> DCs, (D) XCR1<sup>+</sup>Sirp<sup>-</sup>cDC1s, (E) XCR1<sup>-</sup>Sirp<sup>+</sup>cDC2s, (F) Ly6G<sup>+</sup>Ly6C<sup>int</sup> polymorphonuclear (PMN) MDSCs, and (G) Ly6G<sup>-</sup>Ly6C<sup>hi</sup> monocytic (M) MDSCs. Data are presented as means ± SEM from at least two independent experiments. Statistical differences were determined using two-way ANOVA followed by post hoc Bonferroni's multiple comparisons tests (\*p < 0.05, \*\*p < 0.01, \*\*\*p < 0.001, \*\*\*\*p < 0.0001). NT = no therapy; NR = non-responder; Res = responder.

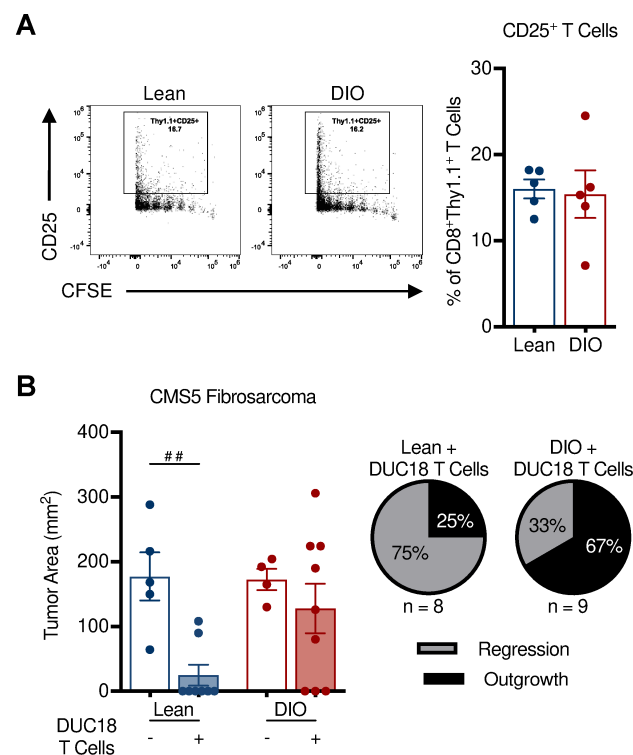

**Supplementary Figure 8. In mice with transplanted fibrosarcoma, the obese host environment does not hinder upstream T cell priming, but T cell-mediated tumor clearance remains impaired.** Lean and DIO BALB/c mice were challenged with subcutaneous CMS5 fibrosarcoma. On day 4 post tumor challenge, antigen-specific DUC18 T cells were adoptively transferred into a subset of mice while others remained as no-transfer controls. Four days after adoptive transfer with CFSE-labeled DUC18 T cells, tumor-draining lymph nodes were harvested from a subset of animals and stained for (A) CFSE and CD25 on DUC18 Thy1.1<sup>+</sup>CD8<sup>+</sup> T cells. (B) Endpoint tumor areas at day 21 for DUC18 T cell recipients or day 15 for no-transfer controls. Pie charts indicate percentages of DUC18 recipients with tumor outgrowth or regression. Data are pooled from at least two independent experiments and presented as means  $\pm$  SEM. Statistical differences were calculated using non-parametric Mann-Whitney U tests (## $p < 0.01$ ).

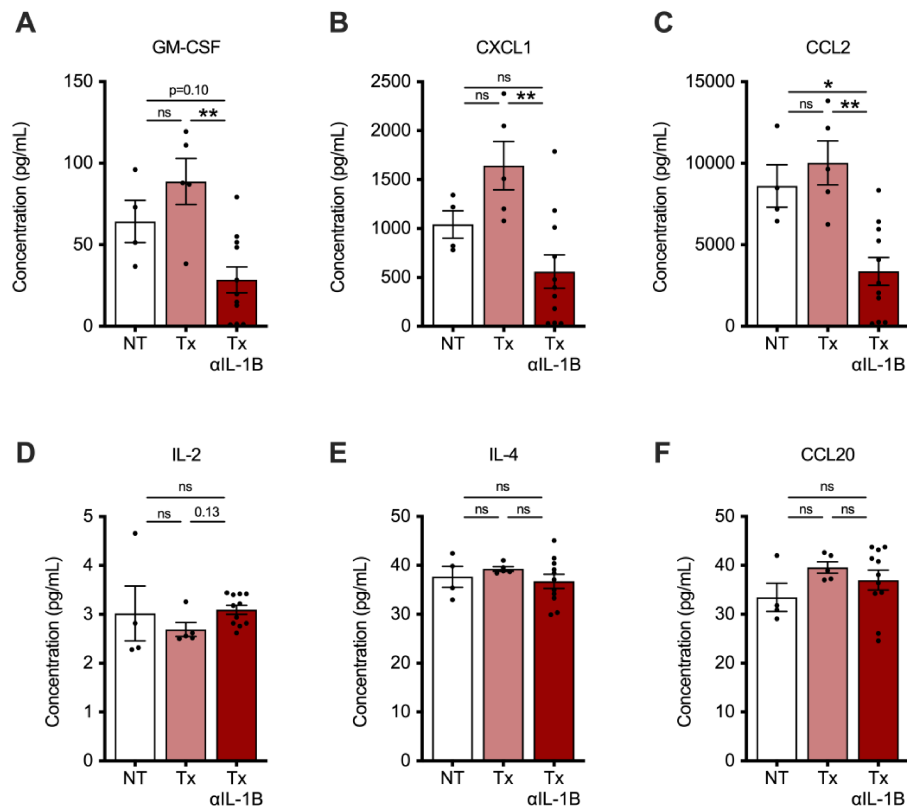

**Supplementary Figure 9. Neutralization of IL-1B results in the specific reduction in the concentration of multiple myeloid-associated cytokines/chemokines in the obese renal tumor microenvironment but has little to no off-target effects on unrelated cytokines.** DIO animals were treated with no therapy or AdTR/CpG/PD-1 ± anti-IL-1β neutralizing antibody. Day 28 endpoint quantification of the intratumoral concentrations of myeloid-related (A) GM-CSF, (B) CXCL1, and (C) CCL2. Data are pooled from two independent experiments and presented as means ± SEM. Statistical differences were calculated using parametric one-way ANOVA (\*p<0.05, \*\*p<0.01). Intratumoral concentrations of unrelated (D) IL-2, (E) IL-4, and (F) CCL20 were assessed for any potential any off-target effects of neutralization. Data are pooled from two independent experiments and presented as means ± SEM. Statistical differences were calculated using either parametric one-way ANOVA or non-parametric Kruskal Wallis ANOVA. NT = no therapy and Tx = AdTR/CpG/PD-1 therapy.

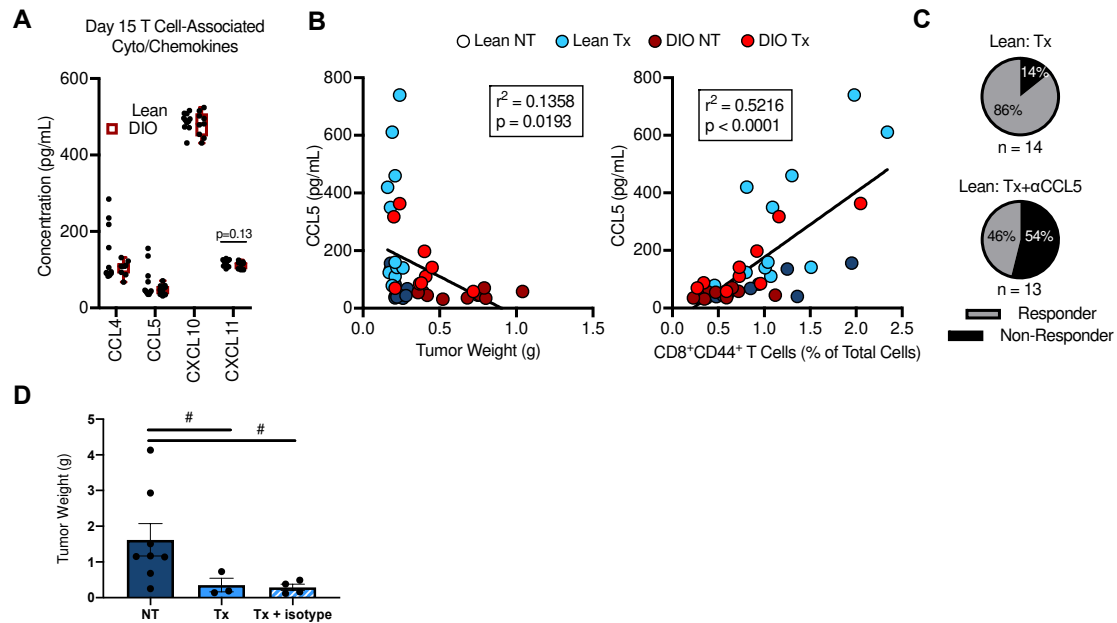

**Supplementary Figure 10. CCL5 neutralization impairs immunotherapy response in lean mice.** On day 15 post tumor challenge lean and DIO treatment-naïve mice were evaluated for (A) intratumoral T cell-associated cyto/chemokines. (B) Linear regression of intratumoral CCL5 concentrations versus (left) tumor weight and (right) associated leukocyte populations in lean and DIO therapy-naïve and therapy-treated animals. (C) Day 28 response rates for lean animals receiving AdTR/CpG/PD-1 ± anti-CCL5 neutralizing antibody. (D) Day 28 comparison of lean mice receiving no therapy or AdTR/CpG/PD-1 ± isotype control. Isotype administration had no effect on therapeutic efficacy. Data are pooled from at least two independent experiments and presented as means ± SEM. Statistical differences were calculated using parametric t-tests, non-parametric Mann-Whitney U tests, linear regression analyses, or Kruskal-Wallis ANOVA as appropriate. NT = no therapy and Tx = AdTR/CpG/PD-1 therapy.

1 Supplemental Table 1. Demographics and characteristics of anti-PD-1 treated RCC patients.

| Variable                     | BMI at 1st dose < 30 |       |       |        |      |      |               | BMI at 1st dose ≥ 30 |       |       |        |       |        |               | p value* |
|------------------------------|----------------------|-------|-------|--------|------|------|---------------|----------------------|-------|-------|--------|-------|--------|---------------|----------|
|                              | N                    | Mean  | SD    | Median | Min  | Max  | Frequency (%) | N                    | Mean  | SD    | Median | Min   | Max    | Frequency (%) |          |
| Age                          | 43                   | 66.4  | 8.9   | 66.5   | 43   | 86   |               | 29                   | 66.4  | 9.6   | 65.0   | 47.0  | 81.0   |               | 0.8277   |
| Male                         | 43                   |       |       |        |      |      | 31 (72.1%)    | 29                   |       |       |        |       |        | 22 (75.9%)    | 0.7219   |
| Race                         | 43                   |       |       |        |      |      |               | 29                   |       |       |        |       |        |               | 1.0000   |
| White                        |                      |       |       |        |      |      | 38 (88.4%)    |                      |       |       |        |       |        | 26 (89.7%)    |          |
| AA                           |                      |       |       |        |      |      | 4 (9.3%)      |                      |       |       |        |       |        | 2 (6.9%)      |          |
| Other                        |                      |       |       |        |      |      | 1 (2.3%)      |                      |       |       |        |       |        | 1 (3.5%)      |          |
| Ethnic group                 | 43                   |       |       |        |      |      |               | 29                   |       |       |        |       |        |               | 1.0000   |
| Non-Hispanic/Latino          |                      |       |       |        |      |      | 42 (97.7%)    |                      |       |       |        |       |        | 28 (96.5%)    |          |
| Unknown                      |                      |       |       |        |      |      | 1 (2.3%)      |                      |       |       |        |       |        | 1 (3.5%)      |          |
| Smoker                       | 27                   |       |       |        |      |      |               | 16                   |       |       |        |       |        |               | 1.0000   |
| Yes                          |                      |       |       |        |      |      | 14 (51.9%)    |                      |       |       |        |       |        | 9 (56.3%)     |          |
| No                           |                      |       |       |        |      |      | 13 (48.1%)    |                      |       |       |        |       |        | 7 (43.7%)     |          |
| BMI at time of 1st dose      | 43                   | 26.5  | 2.7   | 27.1   | 20.7 | 29.4 |               | 29                   | 36.2  | 5.1   | 34.3   | 30.3  | 48.8   |               | <0.0001  |
| Latest BMI                   | 43                   | 25.7  | 3.9   | 26.5   | 18.2 | 32.4 |               | 29                   | 35.6  | 6.1   | 34.7   | 25.7  | 50.7   |               | <0.0001  |
| Diff of BMI (1st - latest)   | 43                   | 0.9   | 2.7   | 0.2    | -4.3 | 6.7  |               | 29                   | 0.6   | 4.4   | 0.6    | -11.9 | 7.4    |               | 0.7924   |
| Follow up time (days)        | 43                   | 638.8 | 316.5 | 585    | 187  | 1212 |               | 29                   | 506.3 | 273.4 | 422.0  | 211.0 | 1269.0 |               | 0.0958   |
| Number of doses of nivolumab | 43                   | 17.9  | 15.0  | 11.0   | 3.0  | 60   |               | 28                   | 15.2  | 15.2  | 8.5    | 3.0   | 72.0   |               | 0.2635   |
| Treatment duration (days)    | 41                   | 302.5 | 287.5 | 196    | 28   | 1139 |               | 27                   | 242.1 | 259.6 | 148.0  | 33.0  | 1269.0 |               | 0.4073   |
| Histological subtype         | 43                   |       |       |        |      |      |               | 29                   |       |       |        |       |        |               |          |
| Clear cell                   |                      |       |       |        |      |      | 37 (86.0%)    |                      |       |       |        |       |        | 24 (82.8%)    | 0.7015   |
| Papillary                    |                      |       |       |        |      |      | 4 (9.3%)      |                      |       |       |        |       |        | 2 (6.9%)      |          |
| Unclassified                 |                      |       |       |        |      |      | 2 (4.7%)      |                      |       |       |        |       |        | 3 (10.3%)     |          |
| IMDC risk score              | 42                   |       |       |        |      |      |               | 29                   |       |       |        |       |        |               | 0.7266   |
| 0                            |                      |       |       |        |      |      | 13 (31.0%)    |                      |       |       |        |       |        | 8 (27.6%)     |          |
| 1                            |                      |       |       |        |      |      | 16 (38.1%)    |                      |       |       |        |       |        | 11 (37.9%)    |          |
| 2                            |                      |       |       |        |      |      | 12 (28.6%)    |                      |       |       |        |       |        | 7 (24.1%)     |          |
| 3                            |                      |       |       |        |      |      | 1 (2.4%)      |                      |       |       |        |       |        | 2 (6.9%)      |          |
| 4                            |                      |       |       |        |      |      | 0             |                      |       |       |        |       |        | 1 (3.5%)      |          |
| Number of prior treatments   | 43                   |       |       |        |      |      |               | 29                   |       |       |        |       |        |               | 0.2785   |
| 0                            |                      |       |       |        |      |      | 3 (7.0%)      |                      |       |       |        |       |        | 1 (3.5%)      |          |
| 1                            |                      |       |       |        |      |      | 24 (55.8%)    |                      |       |       |        |       |        | 20 (69.0%)    |          |
| 2                            |                      |       |       |        |      |      | 12 (27.9%)    |                      |       |       |        |       |        | 5 (17.2%)     |          |
| 3                            |                      |       |       |        |      |      | 4 (9.3%)      |                      |       |       |        |       |        | 1 (3.5%)      |          |
| 4                            |                      |       |       |        |      |      | 0             |                      |       |       |        |       |        | 2 (6.9%)      |          |
| Autoimmune Hypothyroidism    | 41                   |       |       |        |      |      |               | 28                   |       |       |        |       |        |               | 0.6415   |
| Yes                          |                      |       |       |        |      |      | 3 (7.3%)      |                      |       |       |        |       |        | 1 (3.6%)      |          |
| No                           |                      |       |       |        |      |      | 39 (92.9%)    |                      |       |       |        |       |        | 27 (96.4%)    |          |
| Deceased                     | 43                   |       |       |        |      |      | 18 (41.9%)    | 29                   |       |       |        |       |        | 18 (62.1%)    | 0.0926   |
| Best response                | 43                   |       |       |        |      |      |               | 29                   |       |       |        |       |        |               | 0.7613   |
| SD                           |                      |       |       |        |      |      | 20 (46.5%)    |                      |       |       |        |       |        | 15 (51.7%)    |          |
| PD                           |                      |       |       |        |      |      | 13 (30.2%)    |                      |       |       |        |       |        | 9 (31.0%)     |          |
| PR                           |                      |       |       |        |      |      | 5 (11.6%)     |                      |       |       |        |       |        | 1 (3.5%)      |          |
| CR                           |                      |       |       |        |      |      | 1 (2.3%)      |                      |       |       |        |       |        | 1 (3.5%)      |          |

|                                                                                                   |    |  |  |  |  |  |            |    |  |  |  |  |  |  |            |        |
|---------------------------------------------------------------------------------------------------|----|--|--|--|--|--|------------|----|--|--|--|--|--|--|------------|--------|
| <b>OR present, not measured</b>                                                                   |    |  |  |  |  |  | 1 (2.3%)   |    |  |  |  |  |  |  | 2 (6.9%)   |        |
| <b>Stopped for toxicity, death, or unknown</b>                                                    |    |  |  |  |  |  | 3 (7.0%)   |    |  |  |  |  |  |  | 1 (3.5%)   |        |
| <b>Objective response rate (ORR)</b>                                                              | 43 |  |  |  |  |  | 7 (16.3%)  | 29 |  |  |  |  |  |  | 4 (13.8%)  | 1.0000 |
| <b>Disease control rate (DCR)</b>                                                                 | 43 |  |  |  |  |  | 27 (62.8%) | 29 |  |  |  |  |  |  | 19 (65.5%) | 0.8132 |
| <b>* Wilcoxon test for continuous variables and Fisher's exact test for categorical variables</b> |    |  |  |  |  |  |            |    |  |  |  |  |  |  |            |        |

2

3 **Supplemental Table 2. Demographics and characteristics of treatment-naive renal**  
 4 **cancer subjects used for TIL analysis.**

|                                 | Renal Cancer Subjects <sup>5</sup> |                      |
|---------------------------------|------------------------------------|----------------------|
|                                 | NOB                                | OB                   |
| Subjects (n)                    | 8                                  | 11                   |
| Sex                             | M 75.00%<br>F 25.00%               | M 45.50%<br>F 54.50% |
| Age (years, mean)               | 63.38                              | 58.27                |
| Age (years, range)              | 42 – 77                            | 46 – 71              |
| BMI (kg/m <sup>2</sup> , mean)  | 25.02                              | 42.24                |
| BMI (kg/m <sup>2</sup> , range) | 19.80 – 28.49                      | 30.66 – 62.78        |
| Histologic Subtype              |                                    |                      |
| Clear Cell                      | 100.00%                            | 73.00%               |
| Other                           | 0.00%                              | 27.00%               |
| Stage (%)                       |                                    |                      |
| T1a                             | 12.50%                             | 36.36%               |
| T1b                             | 25.00%                             | 36.36%               |
| T2a                             | 12.50%                             | 9.09%                |
| T2b                             | 12.50%                             | 0.00%                |
| T3a                             | 37.50%                             | 9.09%                |
| T3b                             | 0.00%                              | 0.00%                |
| N/A                             | 0.00%                              | 9.09%                |
| Grade                           |                                    |                      |
| 1                               | 0.00%                              | 0.00%                |
| 2                               | 50.00%                             | 54.55%               |
| 3                               | 25.00%                             | 27.27%               |
| 4                               | 25.00%                             | 0.00%                |
| NA                              | 0.00%                              | 18.18%               |

6 **Supplemental Table 3. Demographics and characteristics of treatment-naïve renal**  
 7 **cancer subjects and tumor-free donors used for peripheral blood analysis.**

|                                 | Renal Cancer Subjects |               | Tumor-Free Subjects |               |
|---------------------------------|-----------------------|---------------|---------------------|---------------|
|                                 | NOB                   | OB            | NOB                 | OB            |
| Subjects (n)                    | 37                    | 45            | 11                  | 8             |
| Sex                             | M 70.27%              | M 57.78%      | M 27.27%            | M 50.00%      |
|                                 | F 29.73%              | F 42.22%      | F 72.73%            | F 50.00%      |
| Age (years, mean)               | 59.00                 | 57.44         | 60.64               | 54.63         |
| Age (years, range)              | 28 – 83               | 41 – 81       | 35 – 76             | 48 – 68       |
| Weight (kg, mean)               | 76.34                 | 118.42        | 72.67               | 100.05        |
| BMI (kg/m <sup>2</sup> , mean)  | 25.07                 | 38.74         | 25.16               | 32.58         |
| BMI (kg/m <sup>2</sup> , range) | 18.24 – 29.98         | 30.00 – 60.73 | 21.52 – 29.45       | 30.10 – 38.60 |
| Diabetes (%)                    | 13.51%                | 37.78%        | Unavailable         | Unavailable   |
| Histologic Subtype              |                       |               |                     |               |
| Clear Cell                      | 84.00%                | 89.00%        |                     |               |
| Other                           | 16.00%                | 11.00%        |                     |               |
| Stage (%)                       |                       |               |                     |               |
| T1a                             | 54.05%                | 35.56%        |                     |               |
| T1b                             | 13.51%                | 35.56%        |                     |               |
| T2a                             | 2.70%                 | 4.44%         |                     |               |
| T2b                             | 2.70%                 | 2.22%         |                     |               |
| T3a                             | 24.32%                | 20.00%        |                     |               |
| T3b                             | 2.70%                 | 0.00%         |                     |               |
| N/A                             | 0.00%                 | 2.22%         |                     |               |
| Grade                           |                       |               |                     |               |
| 1                               | 0.00%                 | 4.44%         |                     |               |
| 2                               | 32.43%                | 55.56%        |                     |               |
| 3                               | 45.95%                | 20%           |                     |               |
| 4                               | 16.22%                | 11.11%        |                     |               |
| NA                              | 5.41%                 | 8.89%         |                     |               |

8



9 **Supplemental Table 4. Differentially expressed (DE) genes shared between Lean**  
 10 **R vs NR and DIO R vs NR which overlap with yellow, blue, and green clusters**  
 11 **from Figure 5A.**

12  
 13 **Yellow Cluster Overlap (79 genes)**

|                |              |                |               |                |              |               |                |
|----------------|--------------|----------------|---------------|----------------|--------------|---------------|----------------|
| <i>Abcb1a</i>  | <i>Cd200</i> | <i>Cd8a</i>    | <i>Cxcl12</i> | <i>Gpi1</i>    | <i>Il17f</i> | <i>Ltb</i>    | <i>Rps6</i>    |
| <i>Adora2a</i> | <i>Cd34</i>  | <i>Cd8b1</i>   | <i>Cxcl14</i> | <i>Gzma</i>    | <i>Il6st</i> | <i>Map3k5</i> | <i>Sigirr</i>  |
| <i>Angpt1</i>  | <i>Cd36</i>  | <i>Cdh1</i>    | <i>Cxcl16</i> | <i>H2-Aa</i>   | <i>Irf1</i>  | <i>Mavs</i>   | <i>Syt17</i>   |
| <i>App</i>     | <i>Cd3e</i>  | <i>Ceacam1</i> | <i>Cxcr3</i>  | <i>H2-Ab1</i>  | <i>Irf3</i>  | <i>Nrp1</i>   | <i>Tek</i>     |
| <i>C8a</i>     | <i>Cd3g</i>  | <i>Cfb</i>     | <i>Cxcr6</i>  | <i>H2-DMb2</i> | <i>Irf8</i>  | <i>Nt5e</i>   | <i>Thbd</i>    |
| <i>C8g</i>     | <i>Cd55</i>  | <i>Chuk</i>    | <i>Dock9</i>  | <i>Icam1</i>   | <i>Itga6</i> | <i>Pml</i>    | <i>Thy1</i>    |
| <i>Ccl19</i>   | <i>Cd59b</i> | <i>Cmpk2</i>   | <i>Dpp4</i>   | <i>Icam2</i>   | <i>Jam3</i>  | <i>Prf1</i>   | <i>Tie1</i>    |
| <i>Ccl21a</i>  | <i>Cd6</i>   | <i>Ctsh</i>    | <i>Dusp6</i>  | <i>Ifit3</i>   | <i>Kit</i>   | <i>Psen1</i>  | <i>Tnfsf10</i> |
| <i>Ccl27a</i>  | <i>Cd74</i>  | <i>Cx3cl1</i>  | <i>Ecsit</i>  | <i>Il15</i>    | <i>Klrc1</i> | <i>Psen2</i>  | <i>Xbp1</i>    |
| <i>Ccl5</i>    | <i>Cd79b</i> | <i>Cxcl11</i>  | <i>F2rl1</i>  | <i>Il16</i>    | <i>Klrd1</i> | <i>Rorc</i>   |                |

14

15 **Blue Cluster Overlap (96 genes)**

|               |                |                |                |                |              |                |                  |
|---------------|----------------|----------------|----------------|----------------|--------------|----------------|------------------|
| <i>Amica1</i> | <i>Ccl12</i>   | <i>Cd84</i>    | <i>Cxcl2</i>   | <i>Il17rb</i>  | <i>Itga5</i> | <i>Nup107</i>  | <i>Tgfb1</i>     |
| <i>Atf1</i>   | <i>Ccl2</i>    | <i>Cd97</i>    | <i>Cxcr2</i>   | <i>Il18</i>    | <i>Itgam</i> | <i>Oas2</i>    | <i>Thbs1</i>     |
| <i>Bcl10</i>  | <i>Ccl24</i>   | <i>Cdk1</i>    | <i>Dusp4</i>   | <i>Il18r1</i>  | <i>Itgb1</i> | <i>Osm</i>     | <i>Tlr4</i>      |
| <i>Bcl2</i>   | <i>Ccl3</i>    | <i>Cfp</i>     | <i>F13a1</i>   | <i>Il18rap</i> | <i>Jak3</i>  | <i>Ptgs2</i>   | <i>Tlr5</i>      |
| <i>Bcl6</i>   | <i>Ccl7</i>    | <i>Clec4a2</i> | <i>Fcer1g</i>  | <i>Il1b</i>    | <i>Lcn2</i>  | <i>Pvr</i>     | <i>Tnfrsf10b</i> |
| <i>Btk</i>    | <i>Ccr1</i>    | <i>Clec4n</i>  | <i>Fcgr1</i>   | <i>Il1r1</i>   | <i>Litaf</i> | <i>Rel</i>     | <i>Tnfrsf1b</i>  |
| <i>C3ar1</i>  | <i>Cd163</i>   | <i>Clec5a</i>  | <i>Fos</i>     | <i>Il1r2</i>   | <i>Ly96</i>  | <i>Runx1</i>   | <i>Tnfsf18</i>   |
| <i>C4b</i>    | <i>Cd200r1</i> | <i>Creb5</i>   | <i>Gpr183</i>  | <i>Il1r1l</i>  | <i>Lyve1</i> | <i>Serpib2</i> | <i>Trem1</i>     |
| <i>C5ar1</i>  | <i>Cd244</i>   | <i>Csf2rb</i>  | <i>H60a</i>    | <i>Il1rn</i>   | <i>Lyz2</i>  | <i>Siglec1</i> | <i>Trem2</i>     |
| <i>C6</i>     | <i>Cd33</i>    | <i>Csf3r</i>   | <i>Hif1a</i>   | <i>Il4ra</i>   | <i>Msr1</i>  | <i>Slc7a11</i> | <i>Ulbp1</i>     |
| <i>Card9</i>  | <i>Cd37</i>    | <i>Ctsl</i>    | <i>Ifitm2</i>  | <i>Il6</i>     | <i>Mx2</i>   | <i>Socs3</i>   | <i>Usp18</i>     |
| <i>Casp1</i>  | <i>Cd68</i>    | <i>Cxcl1</i>   | <i>Il13ra2</i> | <i>Il6ra</i>   | <i>Nlrp3</i> | <i>Tank</i>    | <i>Vhl</i>       |

16

17 **Green Cluster Overlap (42 genes)**

|              |               |              |                |               |                 |                  |  |
|--------------|---------------|--------------|----------------|---------------|-----------------|------------------|--|
| <i>Anxa1</i> | <i>Ccl8</i>   | <i>Chil3</i> | <i>Ifi35</i>   | <i>Lgals3</i> | <i>Oasl1</i>    | <i>Spn</i>       |  |
| <i>Arg1</i>  | <i>Ccl9</i>   | <i>Csf2</i>  | <i>Ifngr1</i>  | <i>Masp1</i>  | <i>Plaur</i>    | <i>Tal1</i>      |  |
| <i>Birc5</i> | <i>Cd40</i>   | <i>Cxcl3</i> | <i>Il12rb1</i> | <i>Mst1r</i>  | <i>S100a8</i>   | <i>Tnfrsf12a</i> |  |
| <i>Bst1</i>  | <i>Cd47</i>   | <i>H2-M3</i> | <i>Irak4</i>   | <i>Myc</i>    | <i>Serping1</i> | <i>Tnfrsf13c</i> |  |
| <i>C1s1</i>  | <i>Cdkn1a</i> | <i>Hspb2</i> | <i>Isg15</i>   | <i>Ncf4</i>   | <i>Smn1</i>     | <i>Tnfrsf9</i>   |  |
| <i>Ccl6</i>  | <i>Cebpb</i>  | <i>Ifi27</i> | <i>Lbp</i>     | <i>Oas3</i>   | <i>Snai1</i>    | <i>Vim</i>       |  |

18

19 **Supplemental Table 5. List of antibodies and dyes used in this study.**

| <b><i>In Vivo</i> Antibodies</b>            |              |                           |                        |                 |
|---------------------------------------------|--------------|---------------------------|------------------------|-----------------|
| <b>Antigen</b>                              | <b>Clone</b> | <b>Fluorochrome</b>       | <b>Catalog number</b>  | <b>Supplier</b> |
| PD-1 (CD279)                                | RMP1-14      | none                      | BE0146                 | BioXCell        |
| Rat IgG2a Isotype Control                   | 2A3          | none                      | BE0089                 | BioXCell        |
| IL-1B                                       | B122         | none                      | BE0246                 | BioXCell        |
| CCL5                                        | 53405        | none                      | MAB478                 | R&D Systems     |
| <b>Dyes for Flow Cytometry</b>              |              |                           |                        |                 |
| <b>Dye</b>                                  | <b>Clone</b> | <b>Fluorochrome</b>       | <b>Catalog number</b>  | <b>Supplier</b> |
| CFSE                                        | N/A          | N/A                       | C34570                 | ThermoFisher    |
| Zombie Aqua Viability Dye                   | N/A          | N/A                       | 423102                 | BioLegend       |
| Zombie Green Viability Dye                  | N/A          | N/A                       | 423111                 | BioLegend       |
| <b>Murine Antibodies for Flow Cytometry</b> |              |                           |                        |                 |
| <b>Antigen</b>                              | <b>Clone</b> | <b>Fluorochrome</b>       | <b>Catalog number</b>  | <b>Supplier</b> |
| CD3 $\epsilon$                              | 145-2C11     | APC, FITC                 | 100312, 100305         | BioLegend       |
| CD4                                         | GK1.5        | APC/Fire750               | 100460                 | BioLegend       |
| CD8 $\alpha$                                | 53-6.7       | PE/Cy7, A488, APC         | 100722, 100723, 100712 | BioLegend       |
| CD11b                                       | M1/70        | BV510, PE/Cy7             | 101263, 101216         | BioLegend       |
| CD11c                                       | N418         | BV510, APC/Cy7            | 117338, 117324         | BioLegend       |
| CD19                                        | 6D5          | FITC                      | 115505                 | BioLegend       |
| CD25                                        | PC61         | BV421                     | 102033                 | BioLegend       |
| CD26                                        | H194-112     | PE                        | 137803                 | BioLegend       |
| CD44                                        | IM7          | PerCP-Cy5.5               | 103032                 | BioLegend       |
| CD45                                        | 30-F11       | Pacific Blue, PerCP-Cy5.5 | 103126, 103132         | BioLegend       |
| CD45R (B220)                                | RA3-6B2      | FITC                      | 103205                 | BioLegend       |
| CD64                                        | X54-5/7.1    | FITC                      | 139315                 | BioLegend       |
| CD90.1 (Thy1.1)                             | HIS51        | APC                       | 170900-82              | eBioscience     |
| CD161                                       | PK136        | FITC                      | 108705                 | BioLegend       |
| CD172a (Sirp $\alpha$ )                     | P84          | PE-Dazzle 594             | 144016                 | BioLegend       |
| CD274 (PD-L1)                               | 10F.9G2      | BV605                     | 124321                 | BioLegend       |
| CD279 (PD-1)                                | 29F.1A12     | BV421, APC/Fire750        | 135218, 135240         | BioLegend       |
| F4/80                                       | BM8          | FITC                      | 123107                 | BioLegend       |
| Foxp3                                       | 150D         | A647                      | 320014                 | BioLegend       |
| I-A/I-E (MHC II)                            | M5/114.15.2  | BV650                     | 107641                 | BioLegend       |
| I-A <sup>d</sup> (MHC II)                   | 39-10-8      | Alexa Fluor 488           | 115008                 | BioLegend       |
| IFN $\gamma$                                | XMG1.2       | BV421                     | 505830                 | BioLegend       |
| Ly6C                                        | HK1.4        | BV605                     | 128036                 | BioLegend       |
| Ly6G                                        | 1A8          | PerCP-Cy5.5               | 127615                 | BioLegend       |
| Perforin                                    | S16009A      | PE                        | 154306                 | BioLegend       |
| TNF $\alpha$                                | MP6-XT22     | PE/Cy7                    | 506324                 | BioLegend       |
| XCR1                                        | ZET          | BV421                     | 148216                 | BioLegend       |
| <b>Human Antibodies for Flow Cytometry</b>  |              |                           |                        |                 |
| <b>Antigen</b>                              | <b>Clone</b> | <b>Fluorochrome</b>       | <b>Catalog number</b>  | <b>Supplier</b> |
| CD3                                         | HIT3a        | PE                        | 300308                 | BioLegend       |
| CD8                                         | HIT8a        | PerCP-Cy5.5               | 300924                 | BioLegend       |
| CD45RA                                      | HI100        | BV421                     | 304130                 | BioLegend       |
| CD45RO                                      | UCHL1        | FITC                      | 35-0457-T100           | TONBO Biosci.   |
| CD279 (PD-1)                                | EH12.2H7     | PE/Cy7                    | 329918                 | BioLegend       |
| HLA-DR                                      | L243         | APC/Cy7                   | 307618                 | BioLegend       |

20
